# Supplementary material for: Dipeptidyl peptidase 9 triggers BRCA2 degradation and promotes DNA damage repair
Source: PubMed Central journal article supplement — EMBO Rep. 2022 Aug 1;23(10):e54136. doi: 10.15252/embr.202154136 (PMC9535758; doi:10.15252/embr.202154136), 2022-08-01
Supplement: EMBR-23-e54136-s001.pdf [file EMBR-23-e54136-s001.pdf]

## **Appendix**

|                                                                                                                                            |    |
|--------------------------------------------------------------------------------------------------------------------------------------------|----|
| Appendix Figure S1: DPP9-BRCA2 PLA images .....                                                                                            | 2  |
| Appendix Figure S2: Characterization of DPP9 variants in the HEK293 DPP9 KO background. 4                                                  |    |
| Appendix Figure S3: DPP9 binds directly to the BRCA2 N-terminal peptides .....                                                             | 6  |
| Appendix Figure S4: Western blots and summary of PLA experiments between BRCA2 and DPP9, BRCA2 and PALB2 and, BRCA2 and $\gamma$ H2AX..... | 8  |
| Appendix Figure S5: DPP9 activity promotes RAD51 foci formation and chromosomal association.....                                           | 10 |
| Appendix Figure S6: Experimental setup for RAD51 foci rescue assay .....                                                                   | 12 |
| Appendix Table S1: Crystallographic table .....                                                                                            | 14 |

**PLA: DPP9-BRCA2**

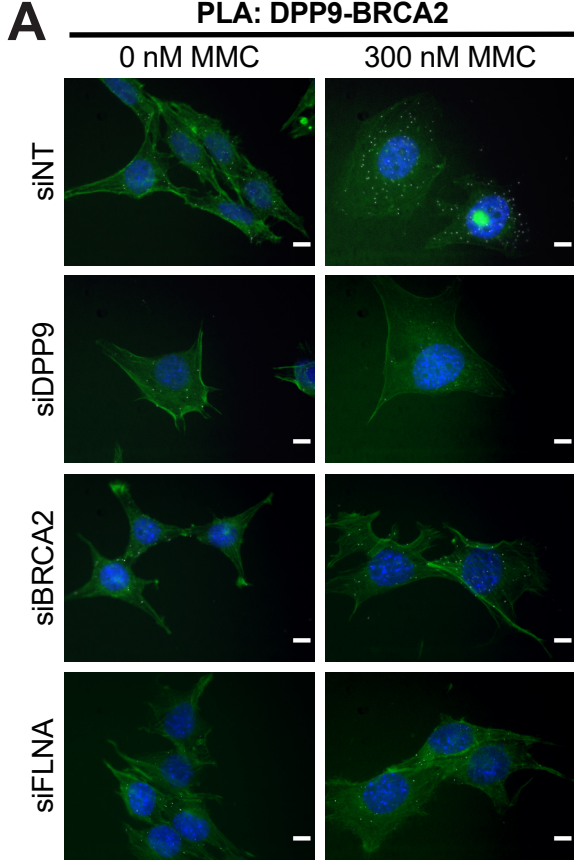

**B**

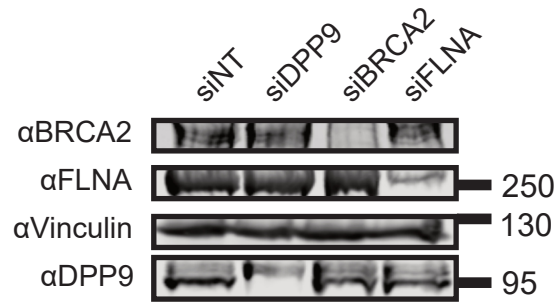

**Appendix Figure S1: DPP9-BRCA2 PLA images**

**A.** Representative PLA images showing close proximity between endogenous DPP9 and endogenous BRCA2 in HeLa WT cells. Exposure of cells to MMC triggers more PLA events. Phalloidin (green) stains actin filaments, DAPI (blue) stains the nucleus. Scale bar 10  $\mu$ m. Anti-BRCA2: RRID:AB\_2259370, Anti-DPP9: RRID:AB\_2889071.

**B.** Representative Western Blot showing the silencing efficiency of HeLa WT cells (A) for DPP9 (siDPP9), BRCA2 (siBRCA2), FLNA (siFLNA) with respect to not-targetted controls (siNT). Vinculin was used as a loading control. Anti-BRCA2: RRID:AB\_2259370, Anti-FLNA: RRID:AB\_877728, Anti-Vinculin: RRID:AB\_477629, Anti-DPP9: RRID:AB\_2889071.

**A**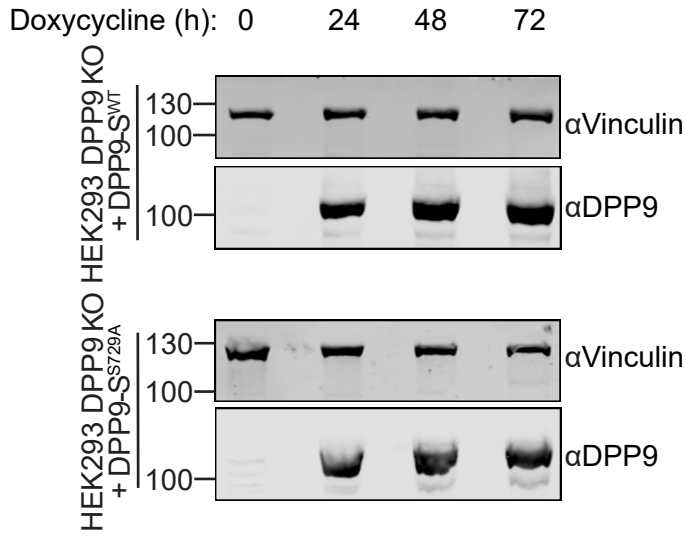**B**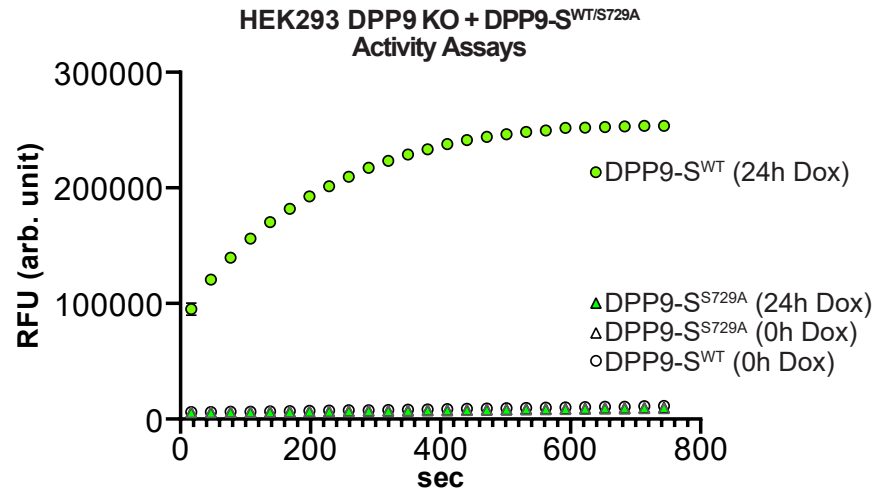**C**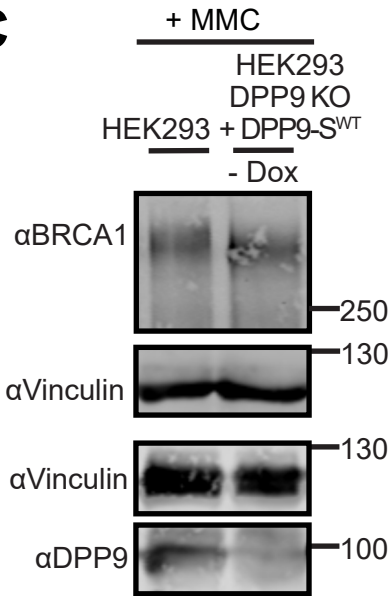**D**

IF: DPP9 Localisation

HEK293

0 nM MMC

300 nM MMC

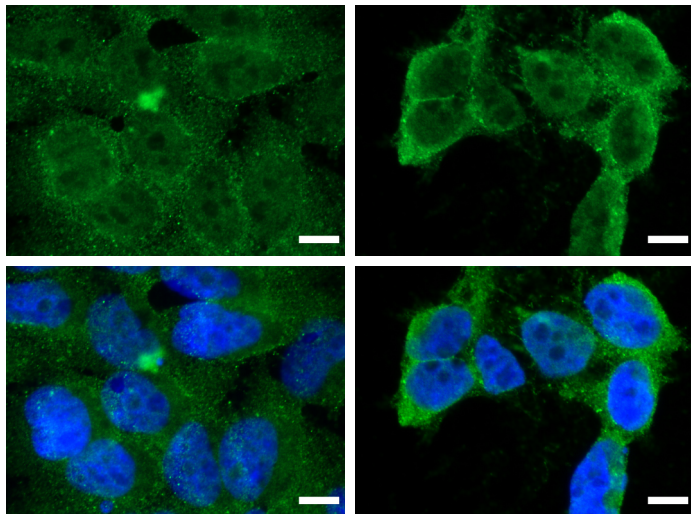**E**

IF: DPP9 Localisation &amp; RAD51 foci

300 nM MMC

HEK293

HEK293  
DPP9 KO  
+ DPP9-S<sup>WT</sup>HEK293  
DPP9 KO  
+ DPP9-L<sup>WT</sup>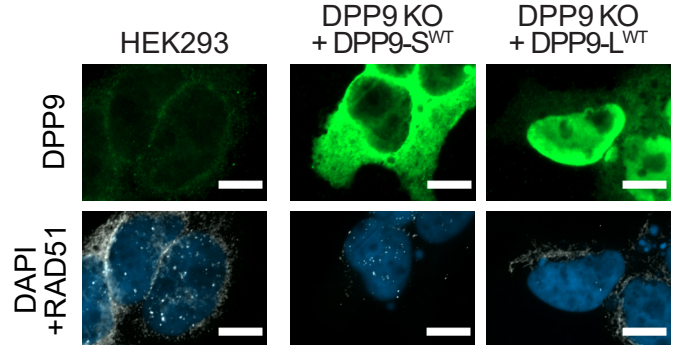

**Appendix Figure S2: Characterization of DPP9 variants in the HEK293 DPP9 KO background**

**A.** Western Blot, showing the time-dependent doxycycline induced expression of DPP9-S<sup>WT</sup> or DPP9-S<sup>S729A</sup> in HEK293 DPP9 KO + DPP9-S<sup>WT</sup> and HEK293 DPP9 KO + DPP9-S<sup>S729A</sup> cells. Vinculin was a loading control.

**B.** Graph showing DPP9 activity in cell lysates following a 24 h incubation with Doxycycline for expression of DPP9-S<sup>WT</sup> in HEK293 DPP9 KO + DPP9-S<sup>WT</sup>, or the enzymatically inactive DPP9-S<sup>S729A</sup> in HEK293 DPP9 KO + DPP9-S<sup>S729A</sup> cells. Cell lysates were prepared following 24 h of exposure to Doxycycline and tested for activity against an artificial DPP9 substrate Gly-Pro-7-amido-4-methylcoumarin hydrobromide (GP-AMC), showing DPP9 activity in cells induced for the expression of the DPP9-S<sup>WT</sup> but not of DPP9-S<sup>S729A</sup>.

**C.** Representative Western Blots showing the levels of DPP9 and BRCA1 in HEK293 and HEK293 DPP9 KO + DPP9-S<sup>WT</sup> cells without Doxycycline treatment. Vinculin was a loading control. Anti-BRCA1: RRID:AB\_626761, anti-DPP9: RRID:AB\_731947, anti-Vinculin: RRID:AB\_477629.

**D.** Immunofluorescence images showing a cytosolic and nuclear localization of DPP9 in HEK293 cells in the presence and absence of MMC induction. DPP9 is shown in green, nuclei (DAPI) are shown in blue. Scale bar 10  $\mu$ m. Anti-DPP9: RRID:AB\_2889071.

**E.** Immunofluorescence images showing the overexpression levels and localization of the DPP9-S<sup>WT</sup> and DPP9-L<sup>WT</sup> in HEK293 DPP9 KO + DPP9-S<sup>WT</sup> and HEK293 DPP9 KO + DPP9-L<sup>WT</sup> cells in the presence of MMC-induced DNA Damage. DPP9 is shown in green, RAD51 in white, nuclei (DAPI) are shown in blue. Scale bar 10  $\mu$ m. Anti-DPP9: RRID:AB\_2889071, Anti-RAD51: RRID:AB\_1142428.

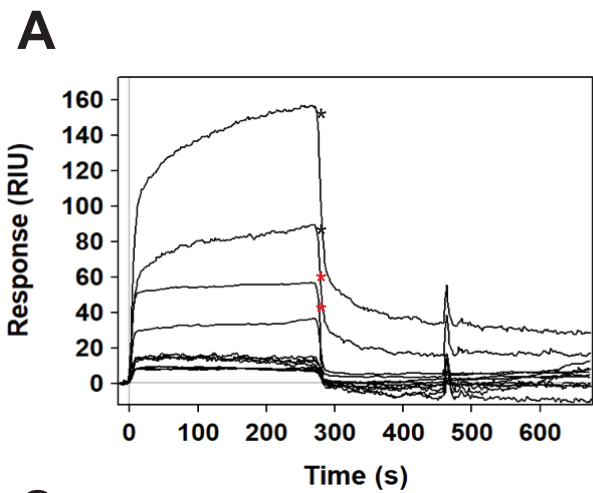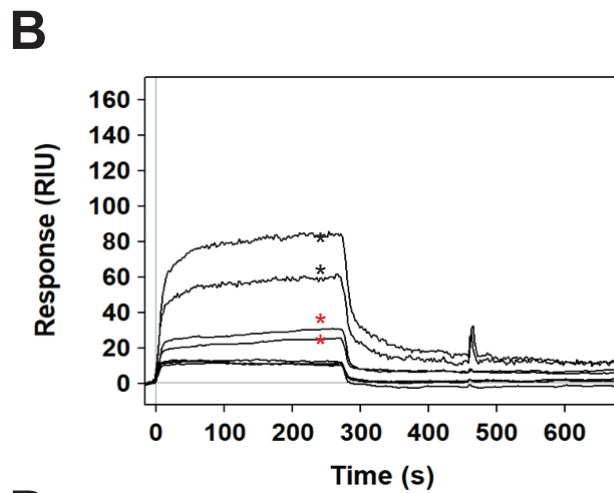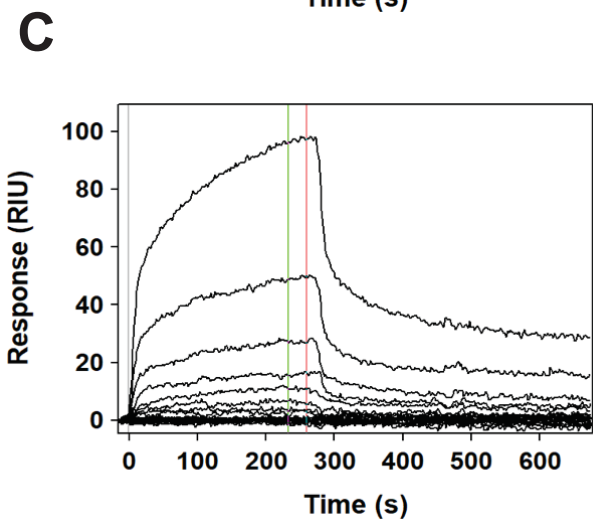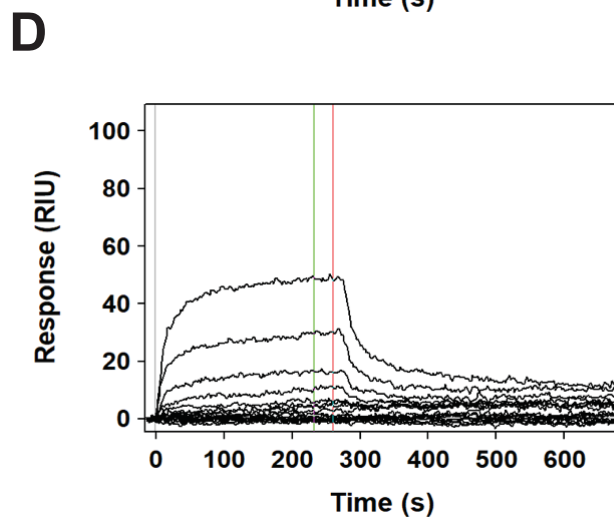

Appendix Figure S3

**Appendix Figure S3: DPP9 binds directly to the BRCA2 N-terminal peptides**

**A.** Sensograms obtained for interactions observed between DPP9 (ligand) and BRCA2<sub>1-40</sub> (analyte). Displayed are raw data before referencing. Marked by (\*black) are sensograms obtained for interactions between ligand and analyte recorded on the ligand channel. Marked by (\*red) are sensograms obtained for interactions between ligand and analyte recorded on the reference channel. Sensograms displayed are a representative of three independent measurements, each containing three technical replicates. Data analyses was performed with Scubber 2.0c, sensograms were double referenced and equilibrium binding response data exported and further analysed by GraphPad Prism.

**B.** Analogous to (A), Ligand DPP9 and Analyte BRCA2<sub>3-40</sub>. Shown are raw data before referencing.

**C.** Sensogram obtained for a serial dilution of BRCA2<sub>1-40</sub> (analyte) injected over a surface, on which 800-1000 RIU DPP9 (ligand) were immobilized. For each analyte injection two buffer injections were performed. Data was double referenced (1st: reference channel, 2nd: buffer injections).

**D.** Sensogram obtained for a serial dilution of BRCA2<sub>3-40</sub> (analyte) injected over a surface, on which 800-1000 RIU DPP9 (ligand) were immobilized, as described in (C).

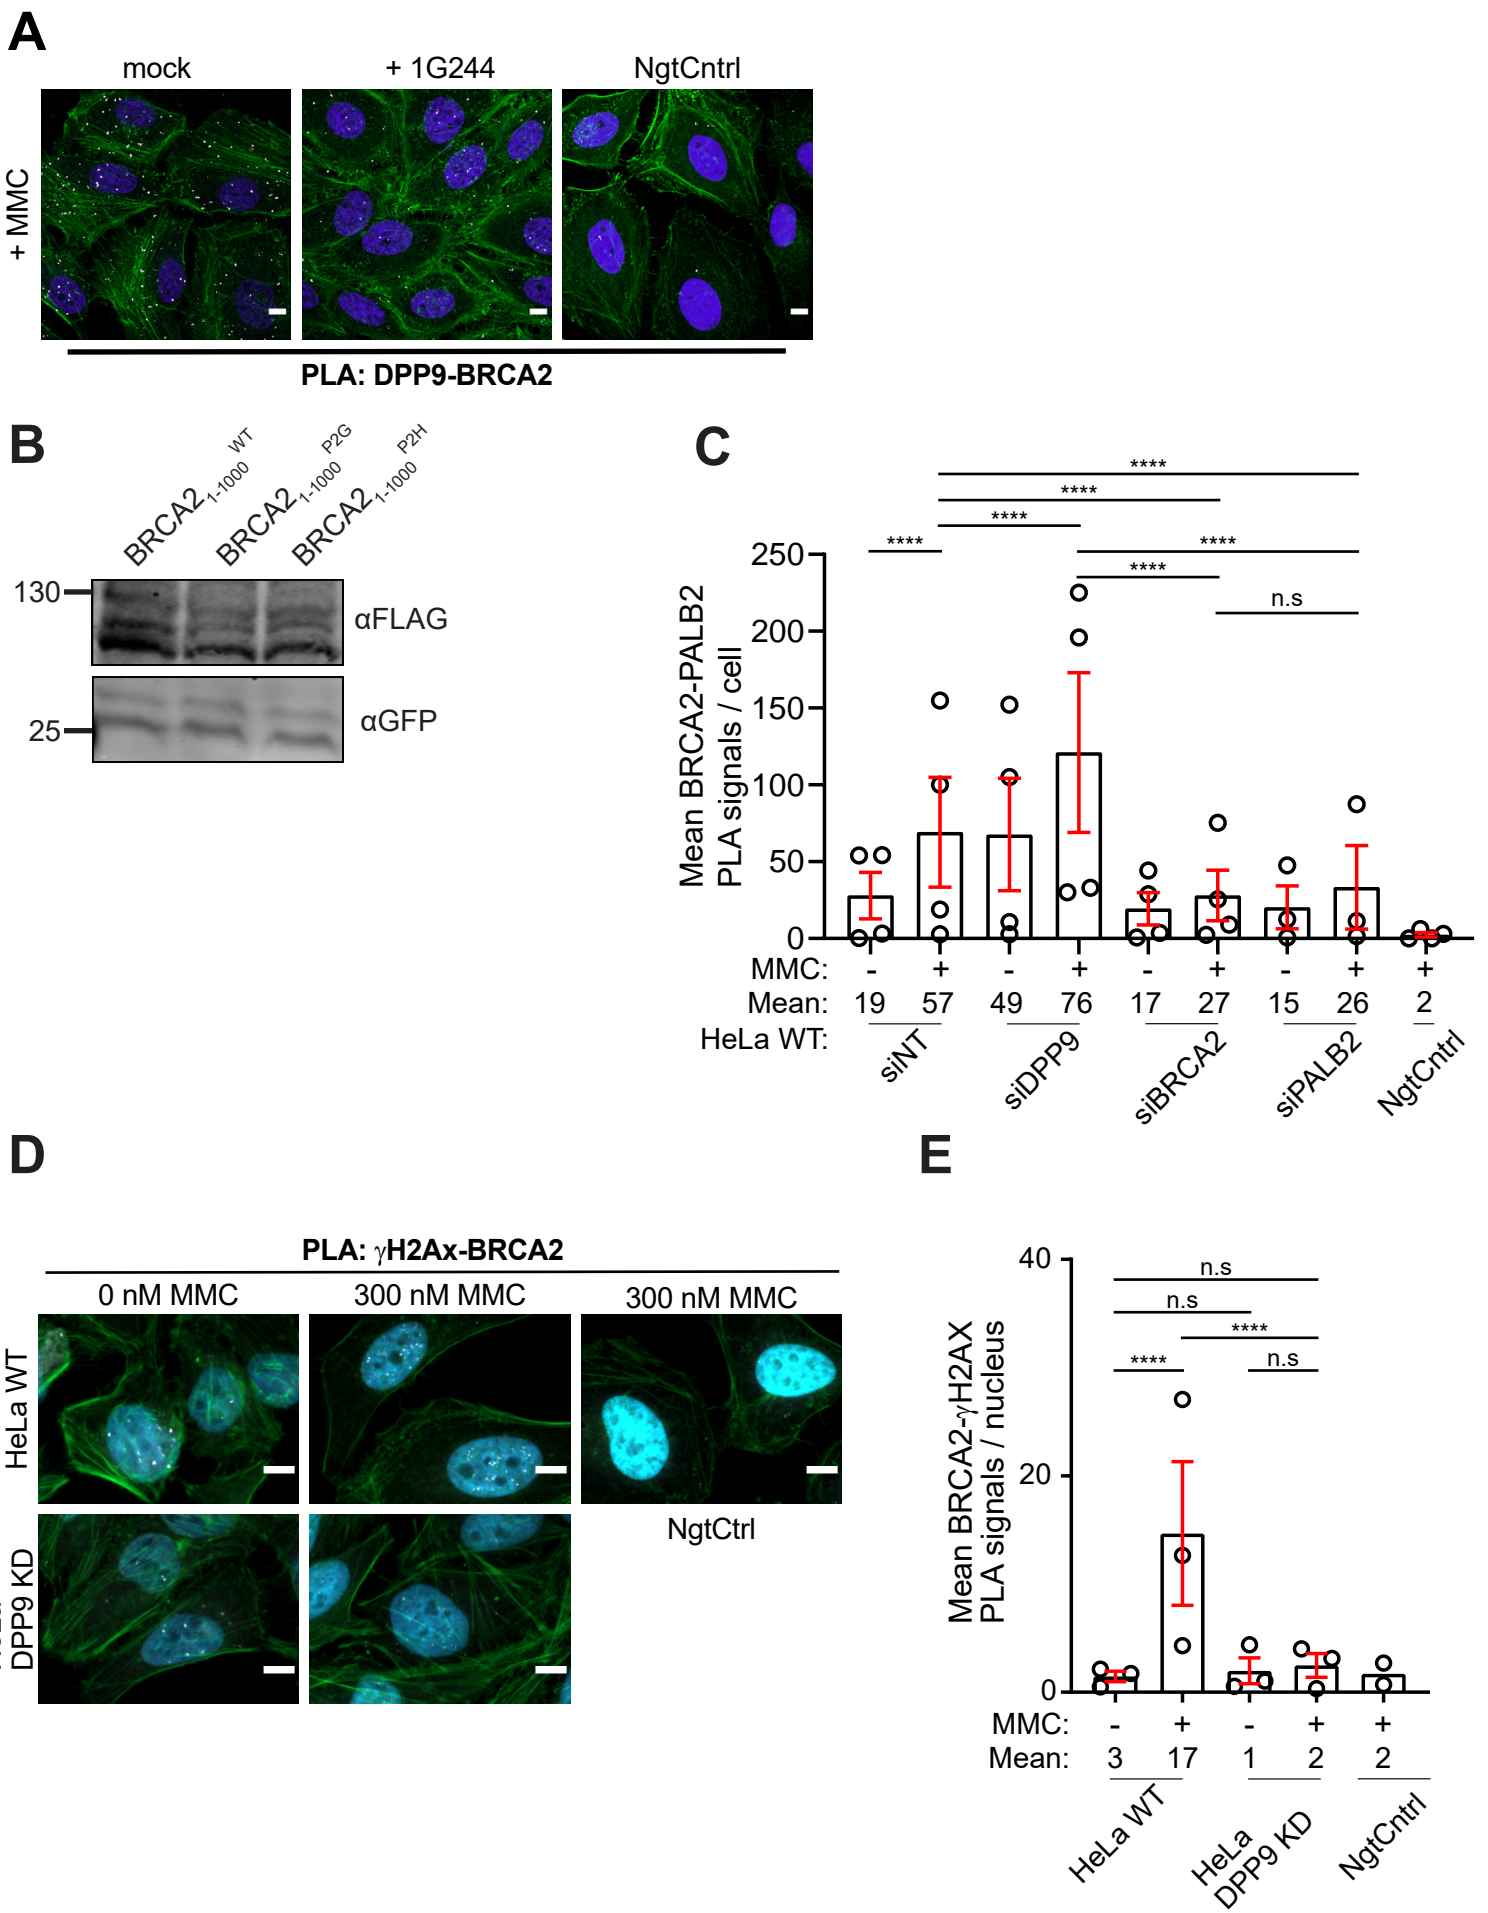

Appendix Figure S4



**Appendix Figure S4: Western blots and summary of PLA experiments between BRCA2 and DPP9, BRCA2 and PALB2 and, BRCA2 and  $\gamma$ H2AX**

**A.** Representative images of HeLa WT cells, showing DPP9-BRCA2 PLA (white) in the presence of 1G244 – a competitive inhibitor of DPP9. Control cells were mock treated with DMSO. Phalloidin (green) stains actin filaments, DAPI (blue) stains the nucleus. Scale bar 10  $\mu$ m. Anti-BRCA2: RRID:AB\_2259370, Anti-DPP9: RRID:AB\_2889071.

**B.** Western Blot image showing the steady state levels of C-terminally FLAG-tagged BRCA2<sub>1-1000</sub><sup>WT</sup>, BRCA2<sub>1-1000</sub><sup>P2G</sup> and BRCA2<sub>1-1000</sub><sup>P2H</sup> fragments. The steady state levels of the BRCA2<sub>1-1000</sub><sup>P2G</sup> and BRCA2<sub>1-1000</sub><sup>P2H</sup> constructs are lower than those of BRCA2<sub>1-1000</sub> implying that the proline in the second position is a determining factor of BRCA2<sub>1-1000</sub> fragment stability. GFP was used as a transfection control. Anti-FLAG: RRID:AB\_262044, Anti-GFP: RRID:AB\_641123.

**C.** Summary of PLAs between BRCA2 and PALB2 in HeLa WT cells treated with non-targeting siRNA (siNT) or silenced with the indicated oligos. Each dot represents the mean number of PLA events in a single repetition, from three to four biological replicates. More than 100 cells were quantified per condition in each experiment. Data from the summary of all PLA events per cell were analysed by a two-way ANOVA, with Tukey's Multiple Comparison test. Shown are Mean  $\pm$  SEM. (\*\*\*\* =  $p \leq 0.0001$ ).

**D.** Representative PLA images of HeLa WT and HeLa DPP9 KD cells. Fewer  $\gamma$ H2Ax-BRCA2 PLA events (white) in HeLa DPP9 KD cells. Phalloidin (green) stains actin filaments, DAPI (blue) stains the nucleus. Scale bar 10  $\mu$ m. Anti- $\gamma$ H2Ax: RRID:AB\_2118009, Anti-BRCA2: RRID:AB\_2259370.

**E.** Summary of PLAs between BRCA2 and  $\gamma$ H2Ax in HeLa WT and HeLa DPP9 KD cells. Each dot represents the mean number of PLA events in a single repetition, from three biological replicates. More than 100 cells were quantified per condition in each experiment. Data from the summary of all PLA events per cell were analysed by a two-way ANOVA, with Tukey's Multiple Comparison test. Shown are Mean  $\pm$  SEM. (\*\*\*\* =  $p \leq 0.0001$ ).

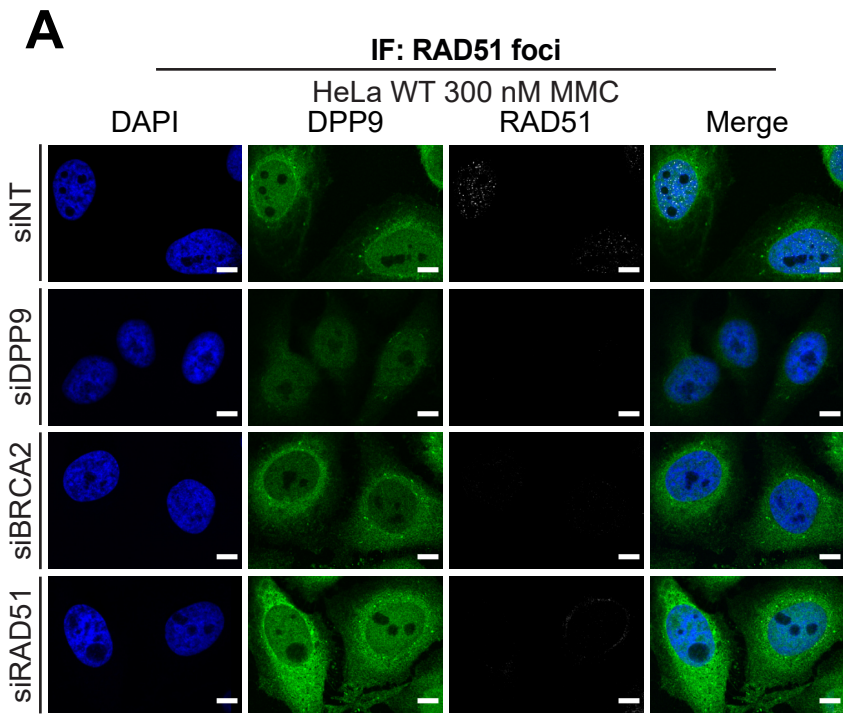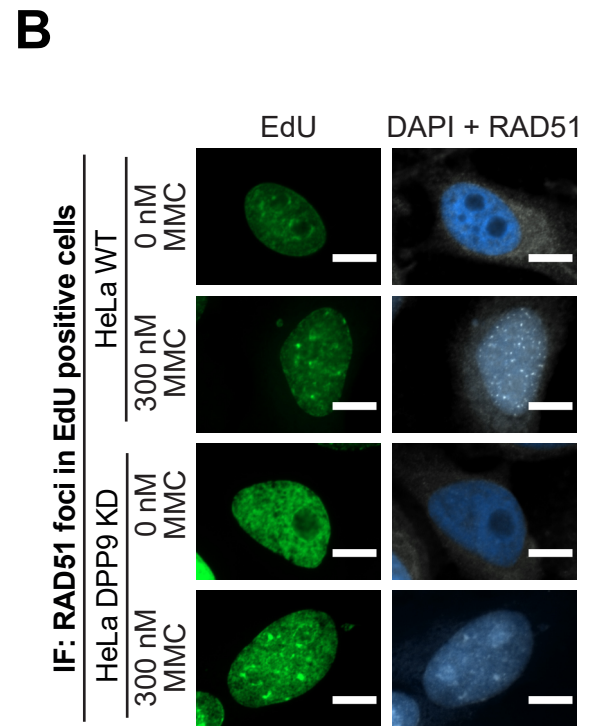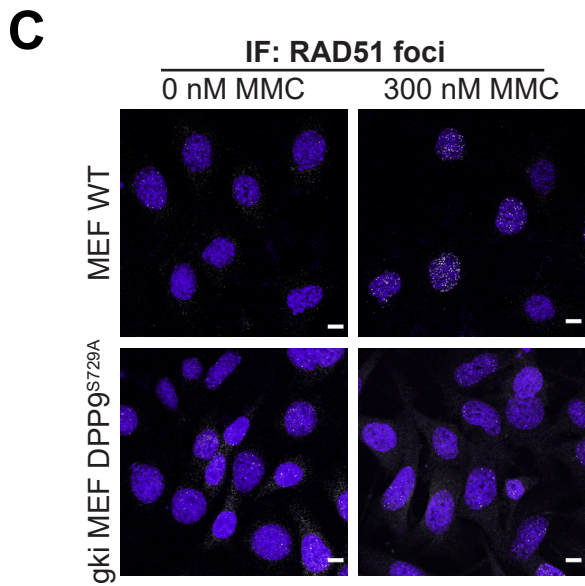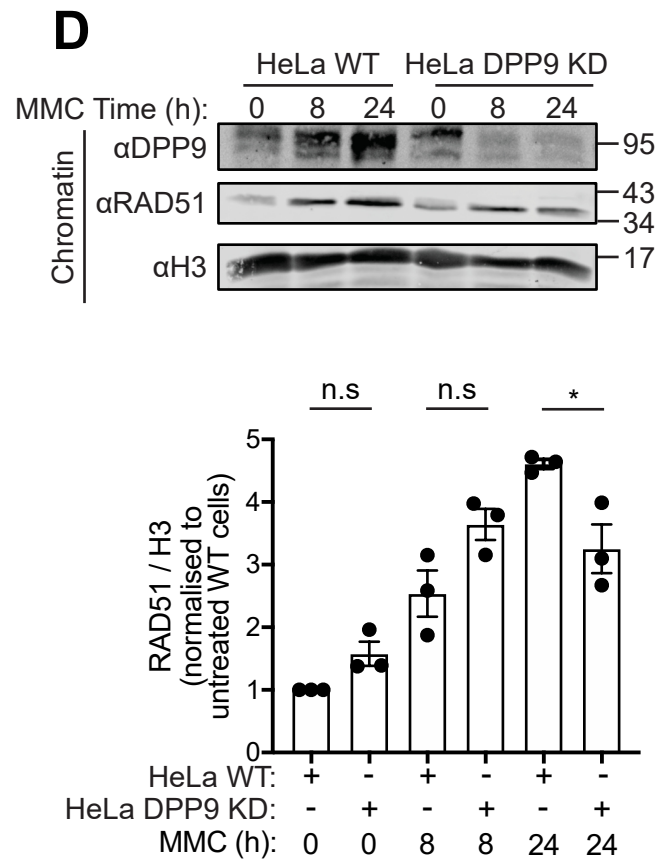

Appendix Figure S5

**Appendix Figure S5: DPP9 activity promotes RAD51 foci formation and chromosomal association**

**A.** Representative immunofluorescence images showing fewer MMC-induced RAD51 foci (white, RRID:AB\_1142428) in HeLa WT cells silenced for DPP9 (siDPP9) compared to HeLa WT cells targeted with non-coding siRNA (siNT). Control cells were silenced for BRCA2 (siBRCA2) or RAD51 (siRAD51). DPP9 is shown in green, nuclei (DAPI) are shown in blue. Scale bar 10  $\mu$ m. Anti-DPP9: RRID:AB\_2889071, Anti-RAD51: RRID:AB\_1142428.

**B.** Representative immunofluorescence images showing fewer RAD51 foci (white, RRID:AB\_1142428) in EdU positive (green) HeLa DPP9 KD cells. DAPI (blue) stains the nucleus. Scale bar 10  $\mu$ m. Anti-RAD51: RRID:AB\_1142428.

**C.** Immunofluorescence images revealing fewer RAD51 foci (white) in gki MEF DPP9<sup>S729A</sup> cells expressing inactive DPP9, compared to MEF WT cells, following exposure to MMC. Nuclei (DAPI) are shown in blue. Scale bar 10  $\mu$ m. Anti-RAD51: RRID:AB\_1142428.

**D.** Representative Western Blot images and quantification of three biological replicates showing that following 24 h incubation with MMC, less RAD51 is associated with chromatin in HeLa DPP9 KD cells compared to HeLa WT cells. Histone 3 (RRID:AB\_331563) was a loading control. Quantification was normalised to HeLa WT cells in the absence of MMC. Data were analysed by a two-way ANOVA with Tukey's Multiple Comparison test. Shown are Mean  $\pm$  SEM. (\* =  $p \leq 0.05$ ).

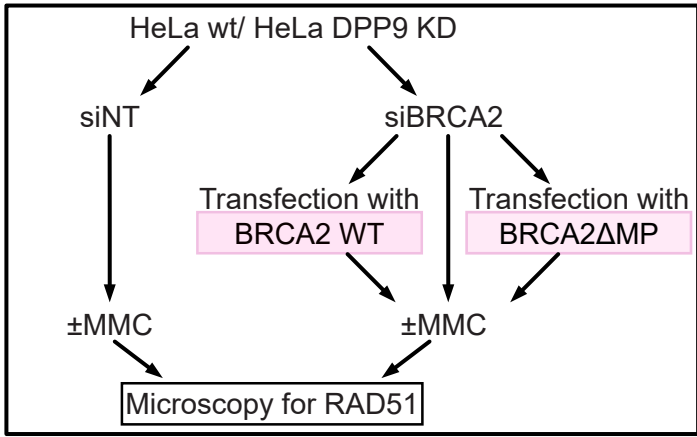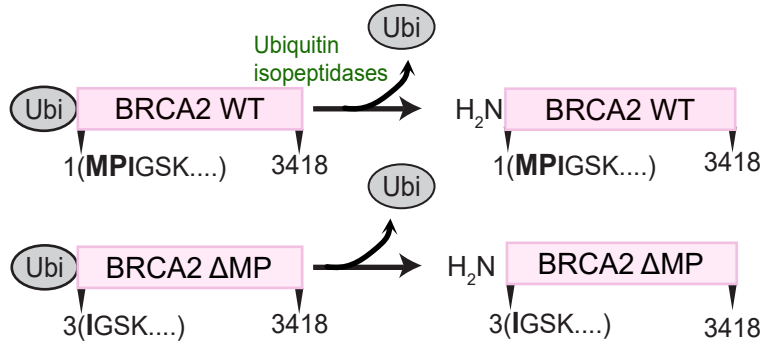

Appendix Figure S6

**Appendix Figure S6: Experimental setup for RAD51 foci rescue assay**

Experimental setup for HeLa WT and HeLa DPP9 KD cells silenced for endogenous BRCA2 and transfected with full-length BRCA2<sub>1-3418</sub> or BRCA2ΔMP<sub>3-3418</sub> constructs and graphical presentation of the full-length BRCA2<sub>1-3418</sub> and BRCA2ΔMP<sub>3-3418</sub> constructs. Cells that are transiently silenced for BRCA2 (siBRCA2) are pooled and split into 3 groups (siBRCA2, siBRCA2 + BRCA2 WT<sub>1-3418</sub>, siBRCA2ΔMP<sub>3-3418</sub>). Both BRCA2 variants are fused to an N-terminal ubiquitin tag, which is removed in cells by endogenous ubiquitin-proteases to expose the desired, defined N-terminus.

## Appendix Table S1: Crystallographic table

Table. Crystallographic parameters for DPP8 and DPP9 -BRCA2 -peptide structures.

|                                       | DPP8 - BRCA2 peptide                   | DPP9 - BRCA2 peptide                          |
|---------------------------------------|----------------------------------------|-----------------------------------------------|
| <i>Data Collection</i>                |                                        |                                               |
| Space Group                           | C222 <sub>1</sub>                      | P2 <sub>1</sub> 2 <sub>1</sub> 2 <sub>1</sub> |
| Resolution (Å)                        | 44.58-3.20<br>(3.28-3.20) <sup>a</sup> | 43.47-3.00<br>(3.19-3.00) <sup>a</sup>        |
| <i>Cell dimensions</i>                |                                        |                                               |
| a, b, c (Å)                           | 162.73 246.07 261.81                   | 119.53 117.32 163.42                          |
| α, β, γ (°)                           | 90, 90, 90                             | 90, 105.74, 90                                |
| R-merge                               | 13.4 (131.4) <sup>a</sup>              | 13.1(30.7) <sup>a</sup>                       |
| I/σ                                   | 17.2 (1.8) <sup>a</sup>                | 5.9(3.0) <sup>a</sup>                         |
| Completeness (%)                      | 99.9 (99.2) <sup>a</sup>               | 87.8(88.8) <sup>a</sup>                       |
| Redundancy                            | 8.37 (8.34) <sup>a</sup>               | 2.65(2.53) <sup>a</sup>                       |
| Total observations                    | 725357 (52815) <sup>a</sup>            | 202589(33069) <sup>a</sup>                    |
| Total unique observations             | 86559 (6331) <sup>a</sup>              | 76534(13092) <sup>a</sup>                     |
| <i>Refinement</i>                     |                                        |                                               |
| R <sub>cryst</sub> /R <sub>free</sub> | 18.39/22.47                            | 28.5/34.5                                     |
| Number of reflections                 | 82126 (4323) <sup>b</sup>              | 72706(3827) <sup>b</sup>                      |
| RMS bonds (°)                         | 0.003                                  | 0.004                                         |
| RMS angles (°)                        | 0.984                                  | 1.120                                         |
| Number of atoms                       | 20409                                  | 26316                                         |
| Average B-factor                      | 84.8                                   | 25.5                                          |
| Ramachandran plot (%)                 |                                        |                                               |
| Preferred region                      | 2312                                   | 2904                                          |
| Allowed region                        | 147                                    | 228                                           |
| Outliers                              | 16                                     | 27                                            |

<sup>a</sup> Values in parentheses correspond to the highest-resolution shell

<sup>b</sup> Values in parentheses correspond to free R-value test set
