# Supplementary figures and images for: Dipeptidyl peptidase 9 triggers BRCA2 degradation and promotes DNA damage repair
Source: PubMed Central journal article supplement — EMBO Rep. 2022 Aug 1;23(10):e54136. doi: 10.15252/embr.202154136 (PMC9535758; doi:10.15252/embr.202154136), 2022-08-01

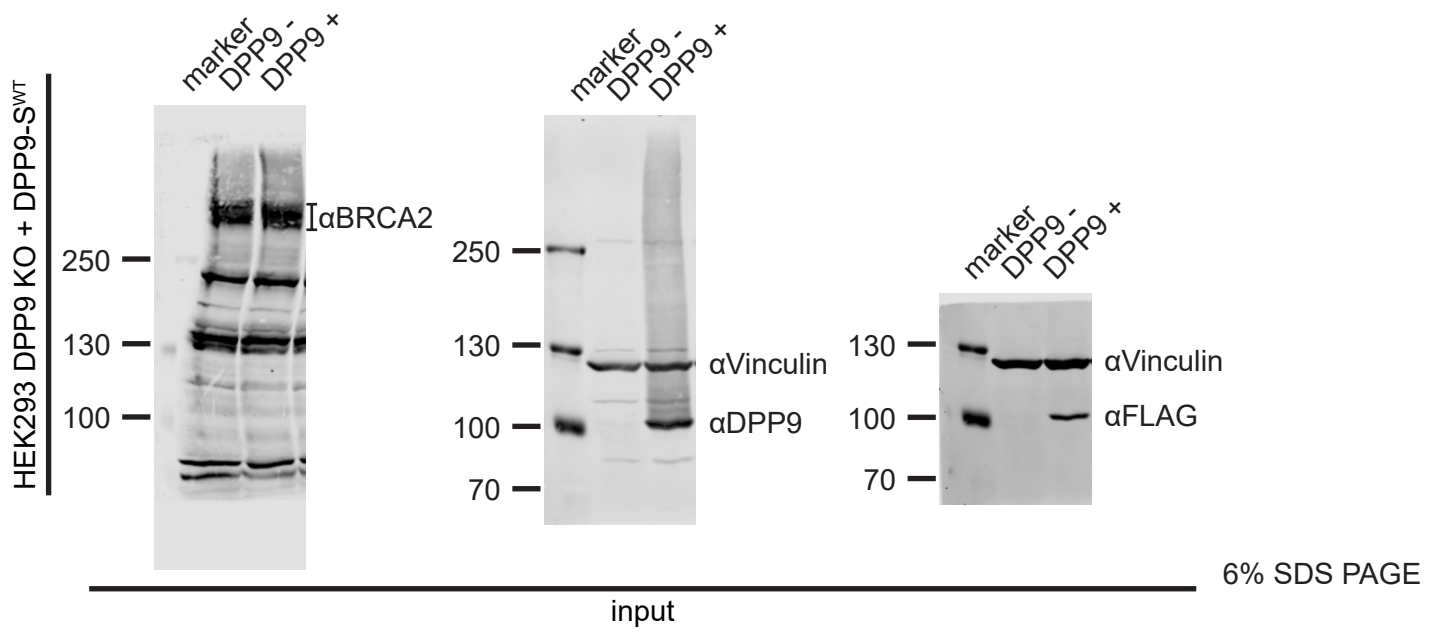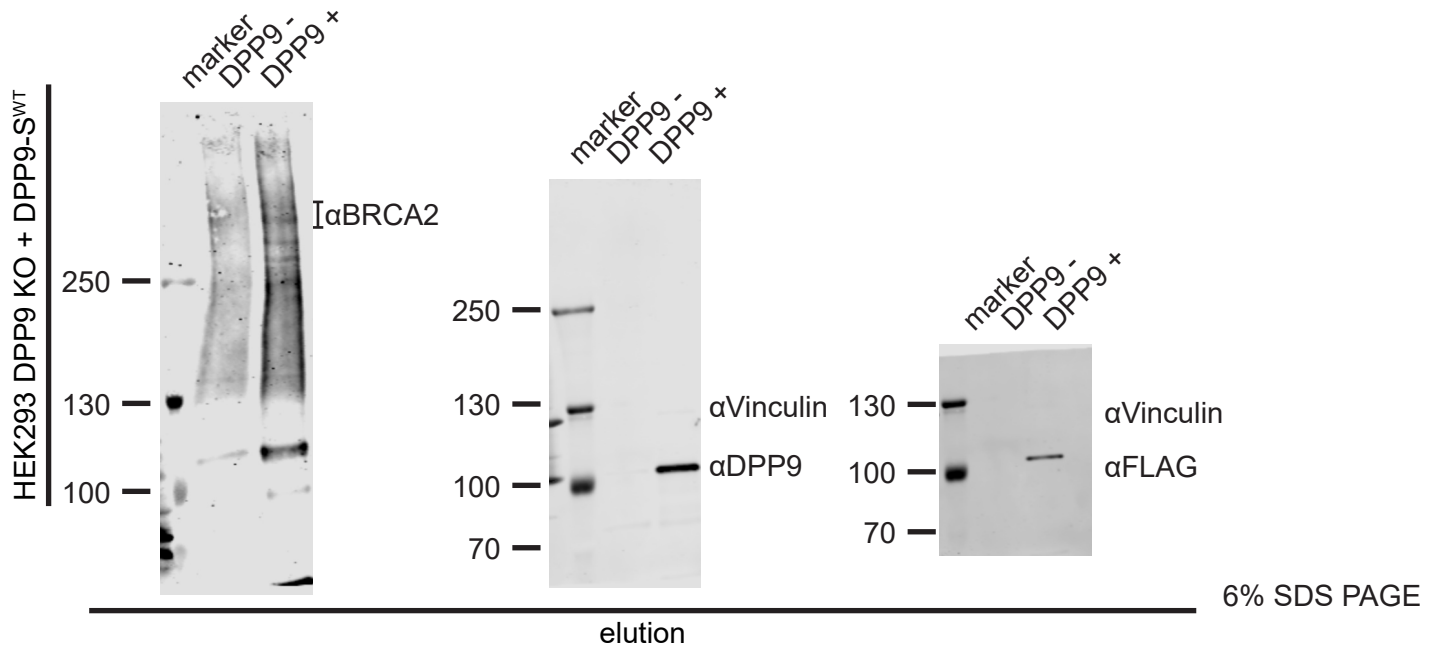

Source data for Figure 1F

Supplement: EMBR-23-e54136-s004.pdf [file EMBR-23-e54136-s004.pdf]

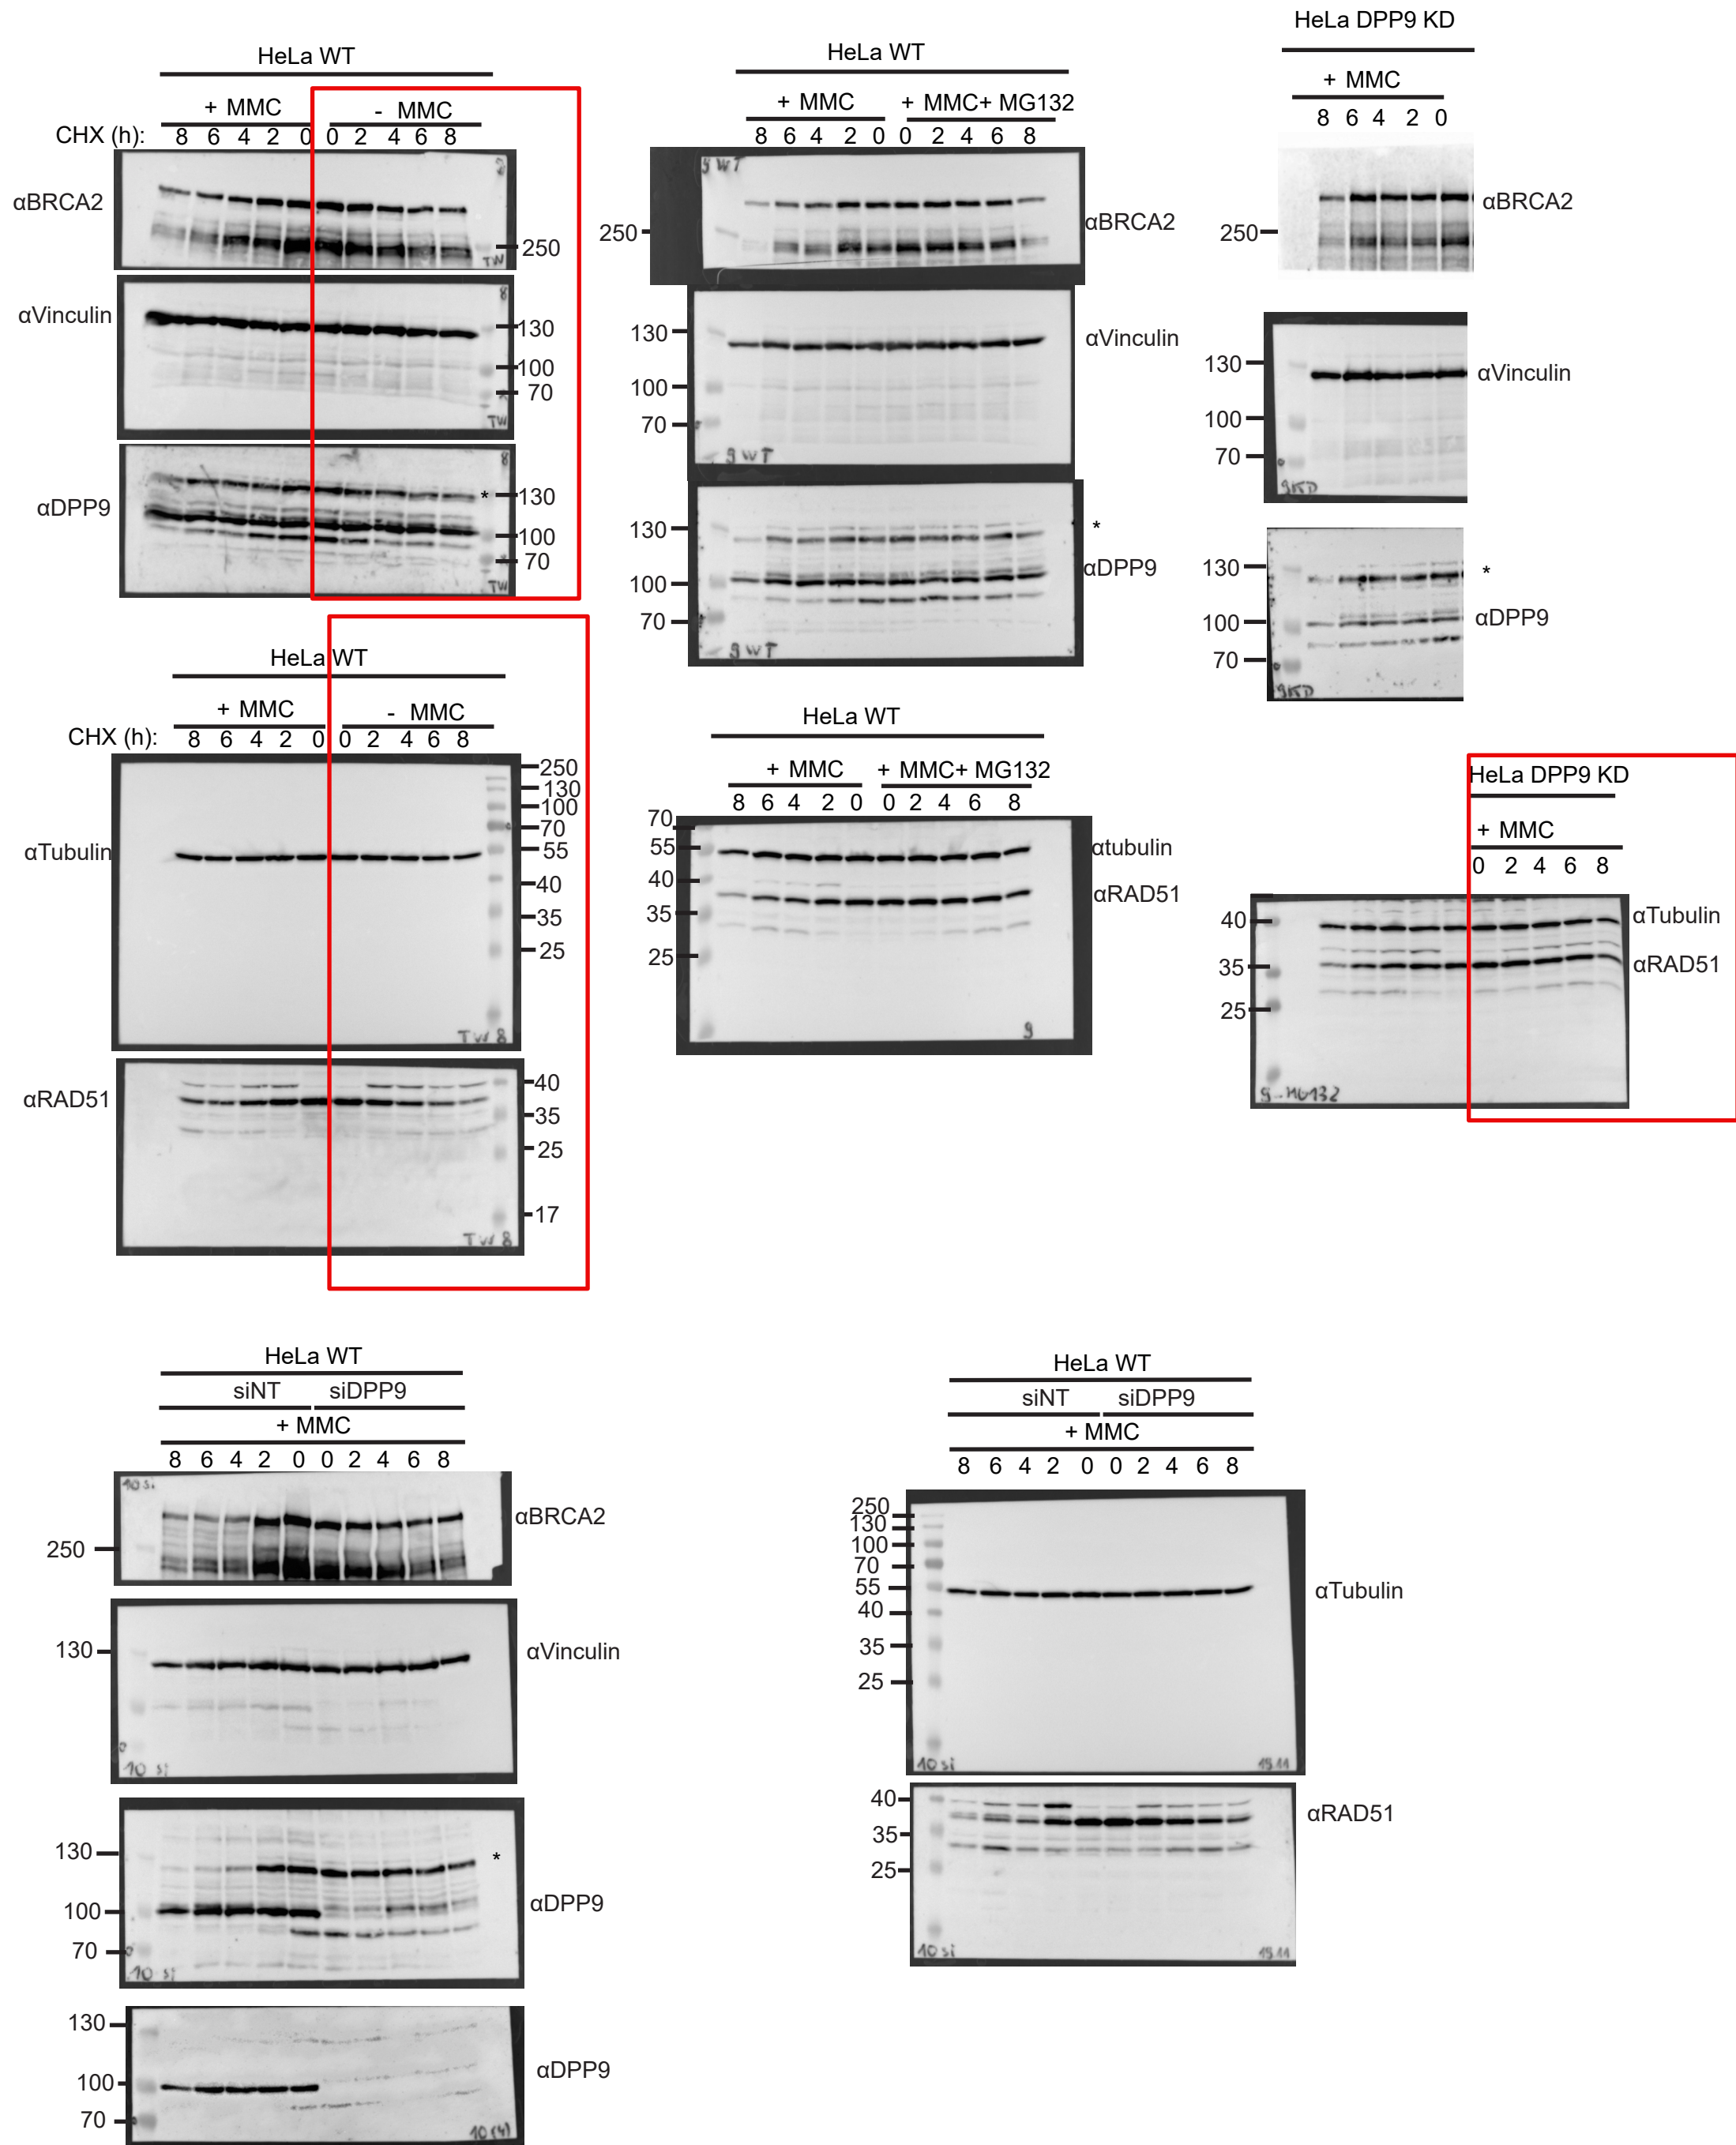

Source data Figure 4A

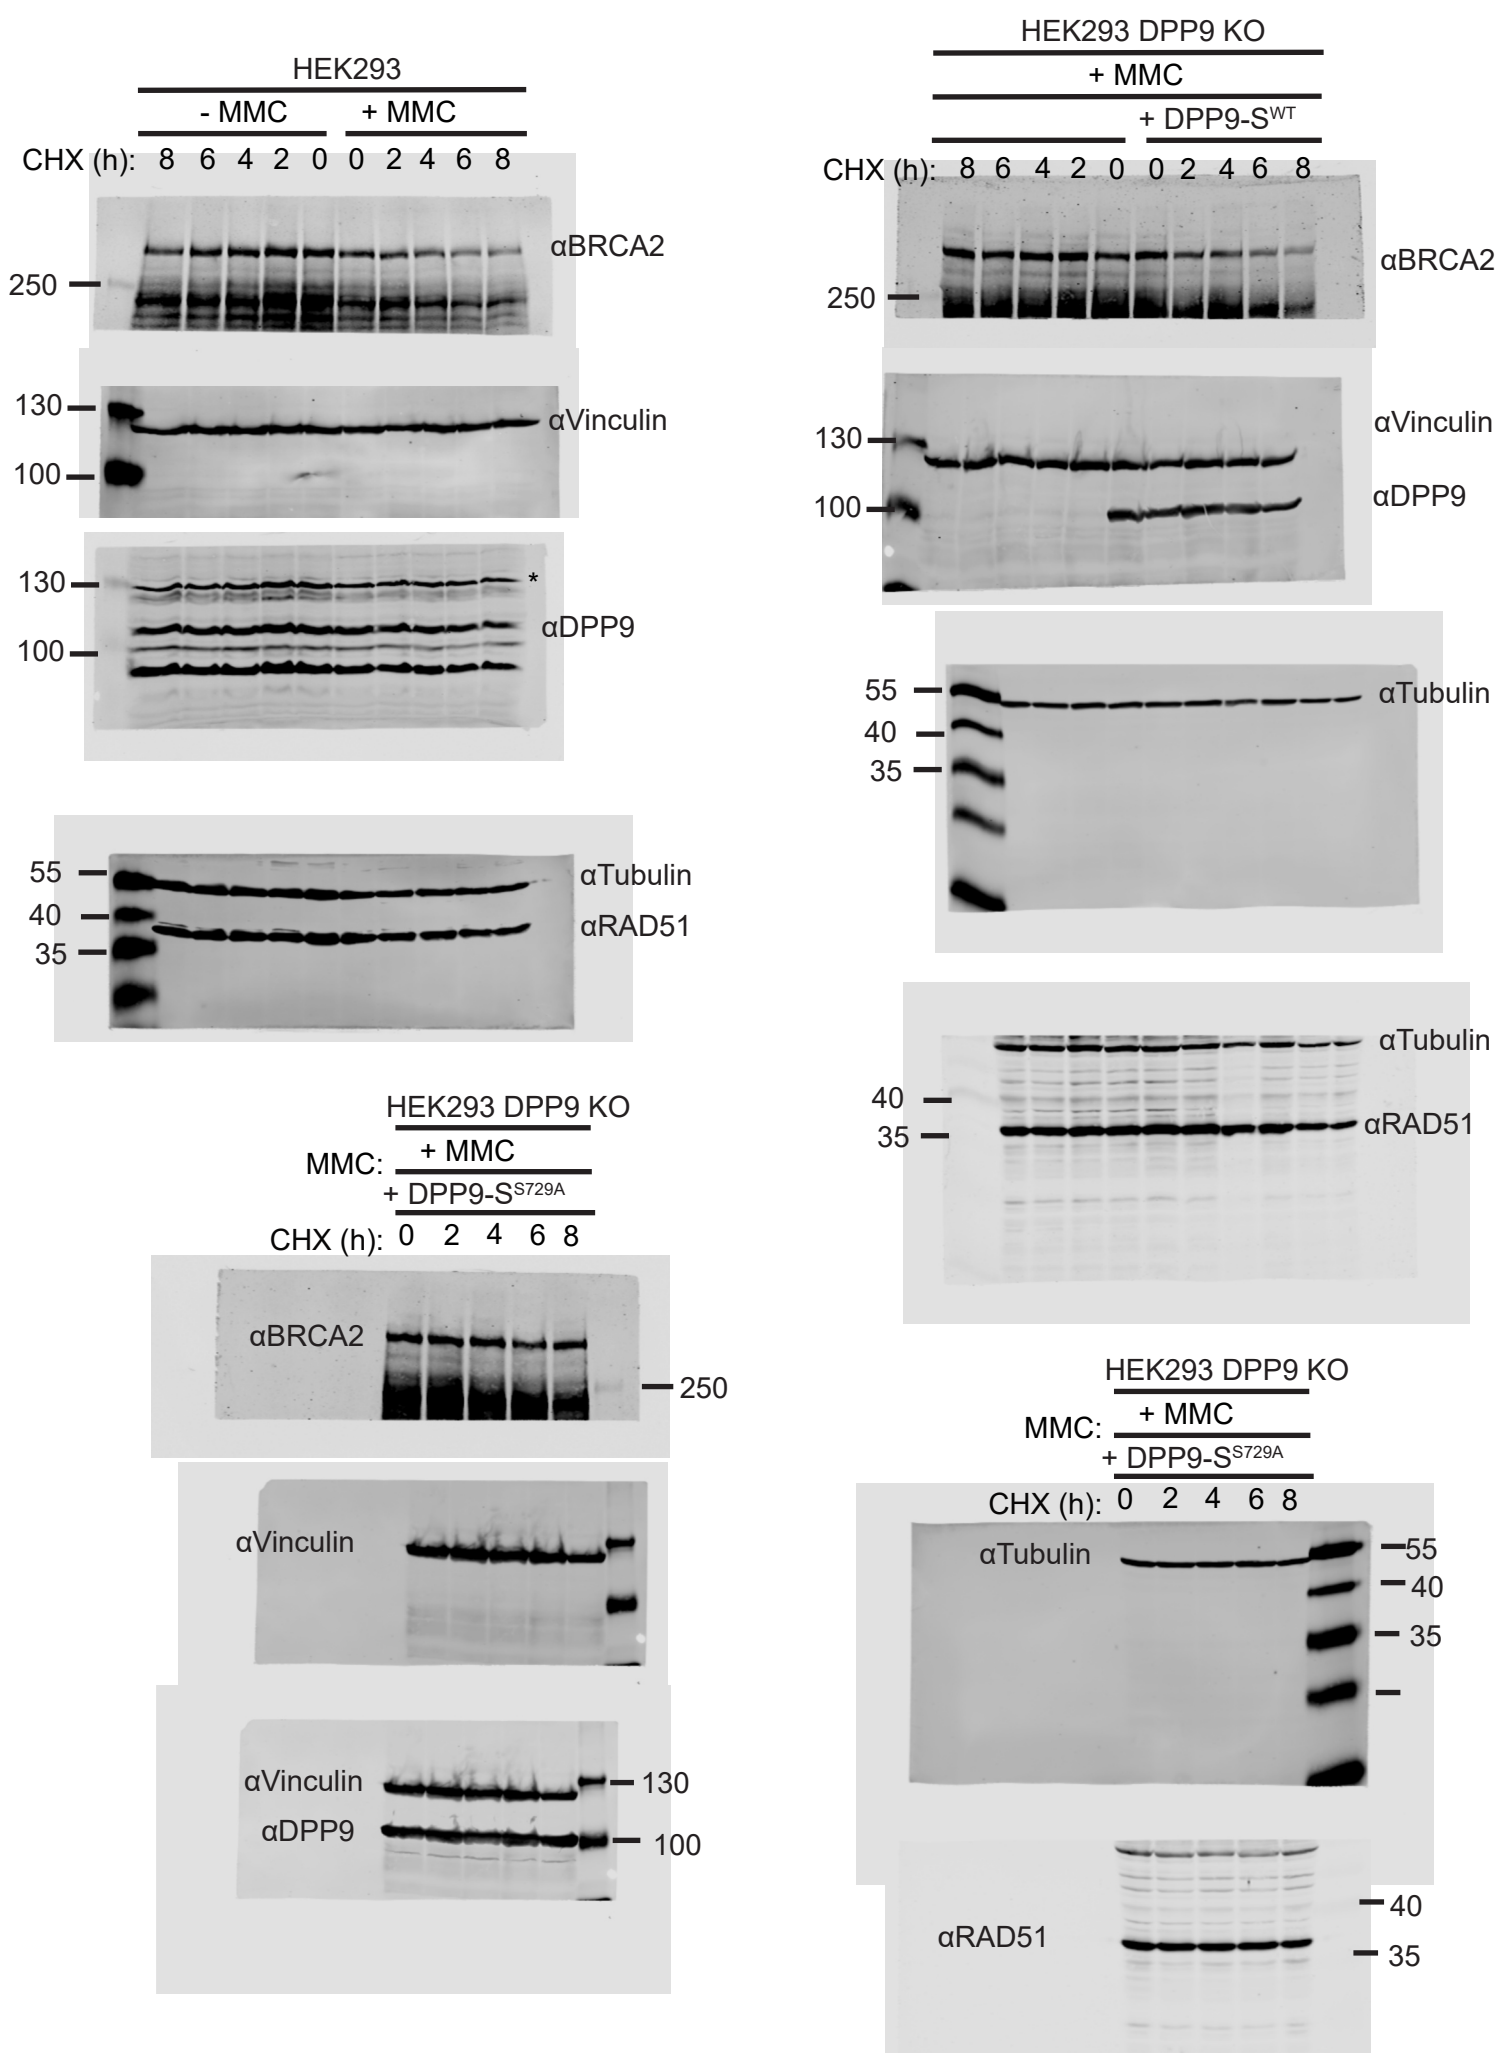

Source data Figure 4C

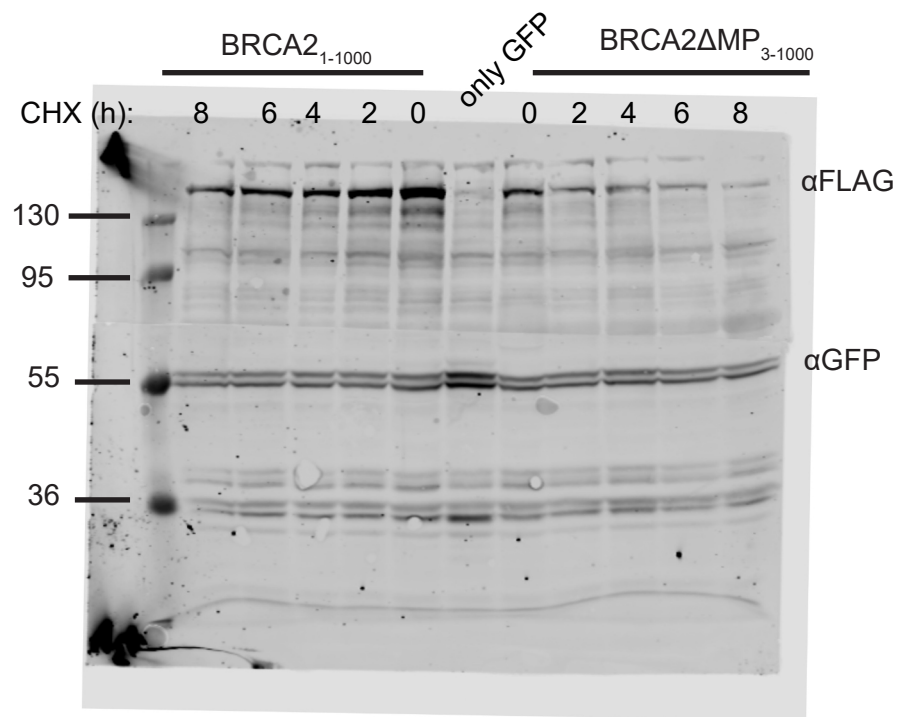

Source data Figure 4G

Supplement: EMBR-23-e54136-s007.pdf [file EMBR-23-e54136-s007.pdf]

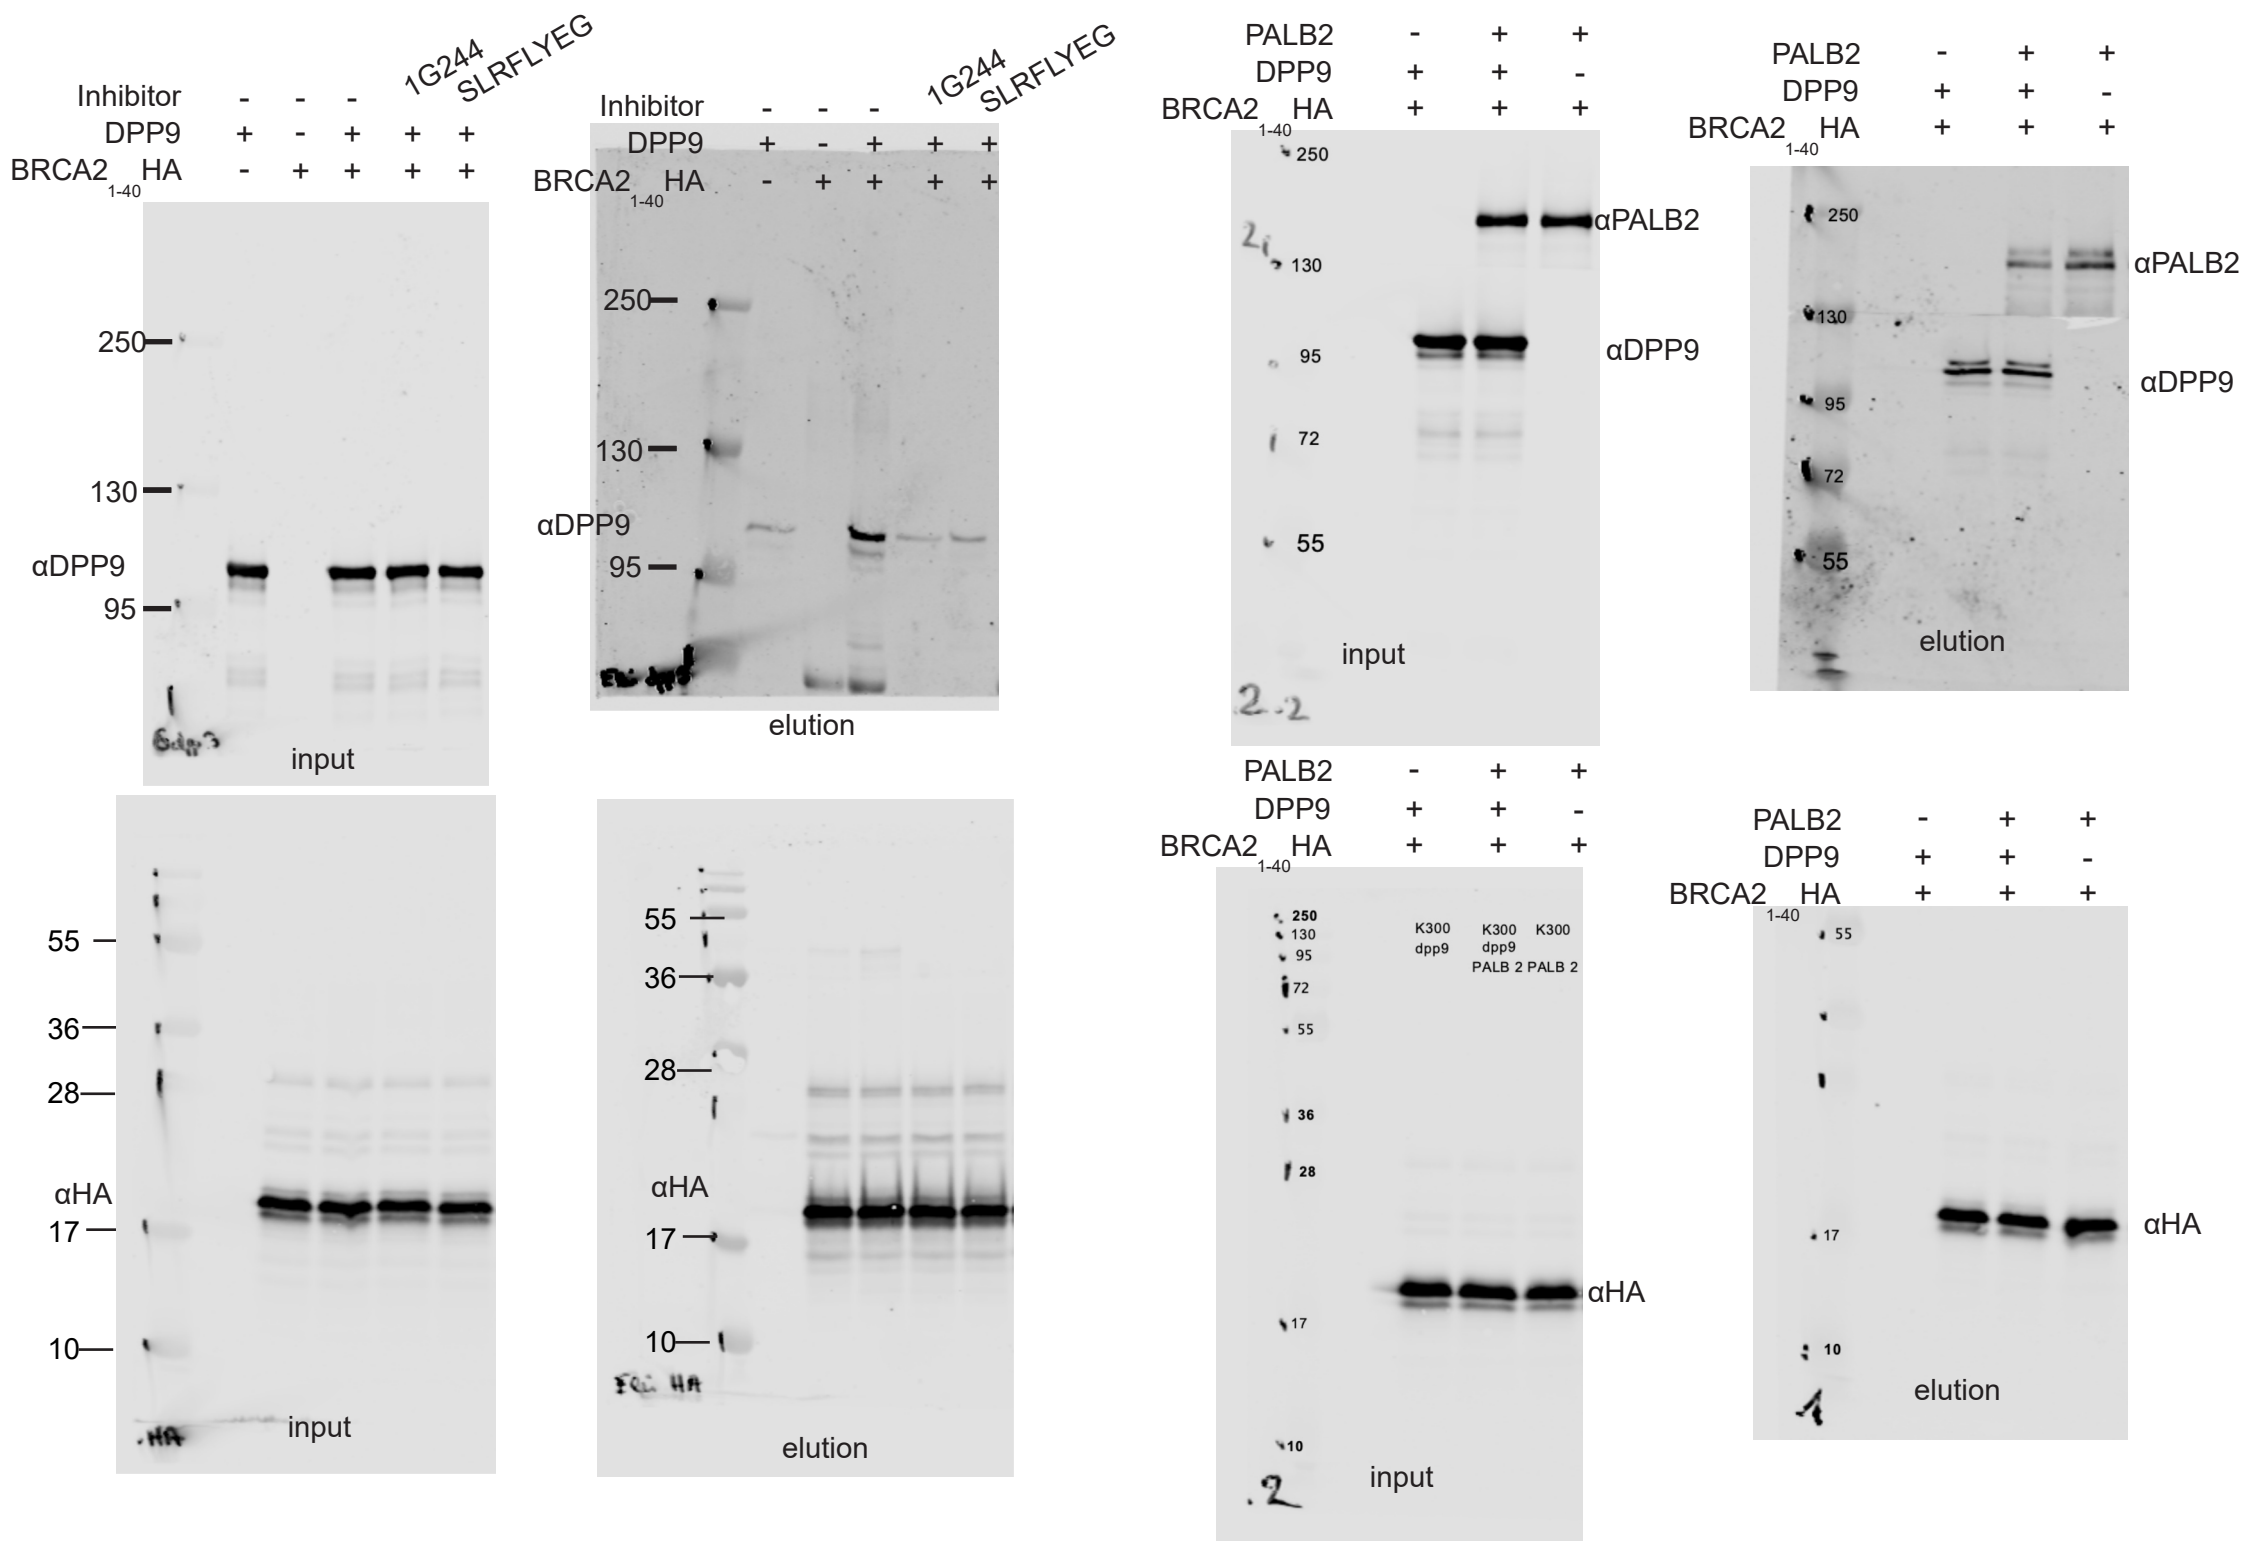

Source data Figure 2B and F

Supplement: EMBR-23-e54136-s008.pdf [file EMBR-23-e54136-s008.pdf]
